# Supplementary material for: Shoot Cultures of Vitis vinifera (Vine Grape) Different Cultivars as a Promising Innovative Cosmetic Raw Material—Phytochemical Profiling, Antioxidant Potential, and Whitening Activity
Source: MDPI journal article supplement (doi:10.3390/molecules28196868), 2023-09-29
Supplement: s1 [file s1]

## SUPPLEMENTARY MATERIALS

# Shoot Cultures of *Vitis vinifera* (vine grape) Different Cultivars as a Promising Innovative Cosmetic Raw Material – The Phytochemical Profiling, Antioxidant Potential and Whitening Activity

Marta Sharafan<sup>1,2</sup>, Magdalena Anna Malinowska<sup>2\*</sup>, Marta Kubicz<sup>1</sup>, Paweł Kubica<sup>1</sup>, Marin-Pierre Gémín<sup>3</sup>, Cécile Abdallah<sup>3</sup>, Manon Ferrier<sup>3</sup>, Christophe Hano<sup>4</sup>, Nathalie Giglioli-Guivarc'h<sup>3</sup>, Elżbieta Sikora<sup>2</sup>, Arnaud Lanoue<sup>3</sup>, Agnieszka Szopa<sup>1\*</sup>

<sup>1</sup> Chair and Department of Pharmaceutical Botany, Medical College, Jagiellonian University, Medyczna 9 St., 30-688 Cracow, Poland; marta.sharafan@doktorant.pk.edu.pl (M.S.); m.kubicz@uj.edu.pl (M.K.); p.kubica@uj.edu.pl (P.K.)

<sup>2</sup> Institute of Organic Chemistry and Technology, Faculty of Chemical Engineering and Technology, Cracow University of Technology, 24 Warszawska St., 31-155 Cracow, Poland; marta.sharafan@doktorant.pk.edu.pl (M.S.); elzbieta.sikora@pk.edu.pl (E.S.)

<sup>3</sup> EA 2106 Biomolécules et Biotechnologies Végétales, UFR des Sciences Pharmaceutiques, Université de Tours, 31 av. Monge, F37200 Tours, France; marin-pierre.gemin@univ-tours.fr (M.-P.G.); cecile.abdallah@ird.fr (C.A.); manon.ferrier@univ-tours.fr (M.F.); (M.F.); nathalie.guivarch@univ-tours.fr (N.G.-G.)

<sup>4</sup> Institut de Chimie Organique et Analytique, Université d'Orléans-CNRS, UMR 7311 BP 6759, CEDEX 2, 45067 Orléans, France

\* Correspondence: a.szopa@uj.edu.pl, tel.: +48-12-620-54-30 (A.S.); magdalena.malinowska@pk.edu.pl, tel.: +48-12-628-25-76 (M.A.M.); arnaud.lanoue@univ-tours.fr (A.L.)

**Table S1.** The quantitative analysis results for the metabolites from shoot cultures of different *V. vinifera* cvs. Values are expressed as mg/g DW ( $\pm$ SD, n=4).

| <i>V. vinifera</i><br>cvs. | Mediu<br>m<br>variant | m1              | m2              | m4              | m5              | m7                | m9              | m3              | m6              | m8              | m12             | m10             | m11             | m13             | m14                 | m15             |
|----------------------------|-----------------------|-----------------|-----------------|-----------------|-----------------|-------------------|-----------------|-----------------|-----------------|-----------------|-----------------|-----------------|-----------------|-----------------|---------------------|-----------------|
|                            |                       | Amino acids     |                 |                 |                 |                   |                 | Organic acid    | Phenolic acid   |                 |                 | Flavan-3-ols    |                 |                 |                     |                 |
|                            |                       | L-proline       | L-tyrosine      | L-isoleucine    | L-leucine       | L-phenylalanine   | L-tryptophan    | citric acid     | gallic acid     | caftaric acid   | coutaric acid   | Procyanid in B1 | Procyanid in B3 | catechin        | Procyanid in trimer | Procyanid in B4 |
| Johanniter                 | W1                    | 0.18 $\pm$ 0.03 | 0.33 $\pm$ 0.06 | 0.82 $\pm$ 0.16 | 0.26 $\pm$ 0.03 | 21.38 $\pm$ 3.31  | 0.17 $\pm$ 0.03 | 0.58 $\pm$ 0.1  | 0.53 $\pm$ 0.1  | 0.74 $\pm$ 0.12 | 0.16 $\pm$ 0.02 | 0.42 $\pm$ 0.08 | 0.33 $\pm$ 0.05 | 1.68 $\pm$ 0.27 | 0.21 $\pm$ 0.05     | 0.1 $\pm$ 0     |
|                            | W2                    | 0.18 $\pm$ 0.02 | 0.9 $\pm$ 0.14  | 1.44 $\pm$ 0.13 | 0.34 $\pm$ 0.03 | 50.43 $\pm$ 2.33  | 0.41 $\pm$ 0.06 | 0.55 $\pm$ 0.07 | 0.23 $\pm$ 0.04 | 0.62 $\pm$ 0.06 | 0.16 $\pm$ 0.02 | 1 $\pm$ 0.17    | 0.39 $\pm$ 0.07 | 2.33 $\pm$ 0.48 | 0.41 $\pm$ 0.09     | 0.08 $\pm$ 0.02 |
|                            | W3                    | 0.18 $\pm$ 0.03 | 0.16 $\pm$ 0.01 | 0.36 $\pm$ 0.05 | 0.13 $\pm$ 0.03 | 15.15 $\pm$ 1.51  | 0.12 $\pm$ 0.02 | 1.12 $\pm$ 0.13 | 0.04 $\pm$ 0.01 | 0.78 $\pm$ 0.08 | 0.22 $\pm$ 0.04 | 0.69 $\pm$ 0.13 | 0.49 $\pm$ 0.04 | 2.73 $\pm$ 0.31 | 0.3 $\pm$ 0.03      | 0.11 $\pm$ 0.01 |
|                            | W4                    | 0.2 $\pm$ 0.03  | 0.2 $\pm$ 0.02  | 0.45 $\pm$ 0.08 | 0.19 $\pm$ 0.04 | 20.63 $\pm$ 2.9   | 0.14 $\pm$ 0.02 | 1.34 $\pm$ 0.22 | 0.06 $\pm$ 0.01 | 0.65 $\pm$ 0.11 | 0.19 $\pm$ 0.02 | 0.52 $\pm$ 0.02 | 0.49 $\pm$ 0.07 | 2.55 $\pm$ 0.44 | 0.31 $\pm$ 0.04     | 0.1 $\pm$ 0.01  |
| Chardonnay                 | W1                    | 0.24 $\pm$ 0.04 | 0.52 $\pm$ 0.09 | 1.06 $\pm$ 0.25 | 0.45 $\pm$ 0.07 | 43.42 $\pm$ 4.58  | 0.22 $\pm$ 0    | 0.76 $\pm$ 0.07 | 0.08 $\pm$ 0.01 | 0.39 $\pm$ 0.01 | 0.13 $\pm$ 0.01 | 0.37 $\pm$ 0.03 | 0.3 $\pm$ 0.03  | 1.35 $\pm$ 0.17 | 0.18 $\pm$ 0.03     | 0.1 $\pm$ 0.01  |
|                            | W2                    | 0.3 $\pm$ 0.03  | 0.35 $\pm$ 0.07 | 0.82 $\pm$ 0.02 | 0.16 $\pm$ 0.01 | 27.23 $\pm$ 0.97  | 0.19 $\pm$ 0.02 | 0.67 $\pm$ 0.08 | 1.58 $\pm$ 0.09 | 0.38 $\pm$ 0.03 | 0.08 $\pm$ 0.01 | 0.18 $\pm$ 0.01 | 0.15 $\pm$ 0.01 | 0.9 $\pm$ 0.15  | 0.12 $\pm$ 0.02     | 0.05 $\pm$ 0.01 |
|                            | W3                    | 0.17 $\pm$ 0.01 | 0.26 $\pm$ 0.01 | 0.63 $\pm$ 0.09 | 0.19 $\pm$ 0.03 | 20.14 $\pm$ 2.55  | 0.12 $\pm$ 0.02 | 1.68 $\pm$ 0.1  | 0.04 $\pm$ 0.01 | 0.43 $\pm$ 0.07 | 0.17 $\pm$ 0.02 | 0.38 $\pm$ 0.08 | 0.29 $\pm$ 0.02 | 1.62 $\pm$ 0.32 | 0.15 $\pm$ 0.03     | 0.05 $\pm$ 0.01 |
|                            | W4                    | 0.16 $\pm$ 0.02 | 0.29 $\pm$ 0.06 | 0.41 $\pm$ 0.02 | 0.21 $\pm$ 0.03 | 27.37 $\pm$ 4.01  | 0.16 $\pm$ 0.03 | 1.81 $\pm$ 0.34 | 0.04 $\pm$ 0    | 0.45 $\pm$ 0.08 | 0.15 $\pm$ 0.03 | 0.39 $\pm$ 0.02 | 0.29 $\pm$ 0.08 | 1.42 $\pm$ 0.11 | 0.21 $\pm$ 0.01     | 0.04 $\pm$ 0.01 |
| Riesling                   | W1                    | 0.18 $\pm$ 0    | 0.26 $\pm$ 0.04 | 0.35 $\pm$ 0.03 | 0.32 $\pm$ 0.04 | 24.16 $\pm$ 2.62  | 0.15 $\pm$ 0.03 | 0.41 $\pm$ 0.07 | 0.08 $\pm$ 0.01 | 0.23 $\pm$ 0.03 | 0.06 $\pm$ 0.01 | 0.07 $\pm$ 0.01 | 0.08 $\pm$ 0.01 | 0.29 $\pm$ 0.04 | 0.03 $\pm$ 0.01     | 0.05 $\pm$ 0    |
|                            | W2                    | 0.18 $\pm$ 0.02 | 0.46 $\pm$ 0.04 | 1.03 $\pm$ 0.03 | 0.32 $\pm$ 0.07 | 38.45 $\pm$ 5.36  | 0.29 $\pm$ 0.03 | 0.95 $\pm$ 0.08 | 0.41 $\pm$ 0.01 | 0.25 $\pm$ 0.03 | 0.09 $\pm$ 0.02 | 0.23 $\pm$ 0.03 | 0.32 $\pm$ 0.05 | 1.19 $\pm$ 0.16 | 0.16 $\pm$ 0.02     | 0.07 $\pm$ 0.01 |
|                            | W3                    | 0.17 $\pm$ 0.03 | 0.2 $\pm$ 0.04  | 0.29 $\pm$ 0.08 | 0.11 $\pm$ 0.01 | 11.5 $\pm$ 0.92   | 0.13 $\pm$ 0.01 | 1.03 $\pm$ 0.11 | 0.07 $\pm$ 0.01 | 0.48 $\pm$ 0.08 | 0.18 $\pm$ 0.02 | 0.16 $\pm$ 0.02 | 0.2 $\pm$ 0.02  | 1.1 $\pm$ 0.21  | 0.11 $\pm$ 0.01     | 0.05 $\pm$ 0.01 |
|                            | W4                    | 0.15 $\pm$ 0.01 | 0.09 $\pm$ 0.02 | 0.38 $\pm$ 0.05 | 0.16 $\pm$ 0.03 | 17.19 $\pm$ 2.74  | 0.16 $\pm$ 0.02 | 2.07 $\pm$ 0.29 | 0.05 $\pm$ 0.01 | 0.21 $\pm$ 0.02 | 0.08 $\pm$ 0.01 | 0.06 $\pm$ 0.01 | 0.02 $\pm$ 0    | 0.16 $\pm$ 0.01 | 0.03 $\pm$ 0.01     | 0.01 $\pm$ 0    |
| Cabernet<br>cortis         | W1                    | 0.27 $\pm$ 0.05 | 0.32 $\pm$ 0.07 | 0.91 $\pm$ 0.22 | 0.45 $\pm$ 0.02 | 61.01 $\pm$ 9.02  | 0.1 $\pm$ 0.01  | 0.7 $\pm$ 0.04  | 0.05 $\pm$ 0.01 | 0.04 $\pm$ 0    | 0.05 $\pm$ 0.01 | 0.1 $\pm$ 0.02  | 0.17 $\pm$ 0.02 | 0.49 $\pm$ 0.09 | 0.05 $\pm$ 0.01     | 0.06 $\pm$ 0.01 |
|                            | W2                    | 0.27 $\pm$ 0.05 | 0.35 $\pm$ 0.1  | 0.82 $\pm$ 0.17 | 0.49 $\pm$ 0.1  | 88.37 $\pm$ 13.19 | 0.12 $\pm$ 0.01 | 0.85 $\pm$ 0.08 | 0.07 $\pm$ 0.01 | 0.06 $\pm$ 0.01 | 0.03 $\pm$ 0    | 0.18 $\pm$ 0.05 | 0.15 $\pm$ 0    | 0.69 $\pm$ 0.13 | 0.07 $\pm$ 0.01     | 0.04 $\pm$ 0.01 |
|                            | W3                    | 0.28 $\pm$ 0.02 | 0.13 $\pm$ 0.02 | 0.7 $\pm$ 0.08  | 0.18 $\pm$ 0.01 | 21.72 $\pm$ 2.52  | 0.12 $\pm$ 0.01 | 1.75 $\pm$ 0.25 | 0.04 $\pm$ 0.01 | 0.2 $\pm$ 0.01  | 0.06 $\pm$ 0.01 | 0.26 $\pm$ 0.05 | 0.22 $\pm$ 0.02 | 1.06 $\pm$ 0.13 | 0.14 $\pm$ 0.02     | 0.07 $\pm$ 0.01 |
|                            | W4                    | 0.41 $\pm$ 0.03 | 0.14 $\pm$ 0.01 | 0.47 $\pm$ 0.1  | 0.16 $\pm$ 0.03 | 27.71 $\pm$ 4.5   | 0.11 $\pm$ 0.02 | 1.96 $\pm$ 0.26 | 0.03 $\pm$ 0    | 0.11 $\pm$ 0.01 | 0.02 $\pm$ 0    | 0.28 $\pm$ 0.07 | 0.25 $\pm$ 0.04 | 1.4 $\pm$ 0.27  | 0.19 $\pm$ 0.04     | 0.14 $\pm$ 0.02 |
| Hibernal                   | W1                    | 0.48 $\pm$ 0.06 | 0.33 $\pm$ 0.05 | 0.86 $\pm$ 0.02 | 0.38 $\pm$ 0.06 | 31.79 $\pm$ 3.1   | 0.12 $\pm$ 0.01 | 1.13 $\pm$ 0.17 | 0.05 $\pm$ 0.01 | 0.15 $\pm$ 0.01 | 0.03 $\pm$ 0    | 0.11 $\pm$ 0.02 | 0.17 $\pm$ 0.02 | 0.62 $\pm$ 0.05 | 0.09 $\pm$ 0.01     | 0.12 $\pm$ 0.02 |
|                            | W2                    | 0.46 $\pm$ 0.08 | 0.34 $\pm$ 0.08 | 0.62 $\pm$ 0.12 | 0.5 $\pm$ 0.11  | 49.57 $\pm$ 4.04  | 0.12 $\pm$ 0.02 | 0.87 $\pm$ 0.04 | 0.09 $\pm$ 0.02 | 0.13 $\pm$ 0.02 | 0.04 $\pm$ 0.01 | 0.33 $\pm$ 0.04 | 0.32 $\pm$ 0.05 | 1.29 $\pm$ 0.16 | 0.15 $\pm$ 0.03     | 0.1 $\pm$ 0.01  |
|                            | W3                    | 0.21 $\pm$ 0.03 | 0.19 $\pm$ 0.01 | 0.4 $\pm$ 0.07  | 0.25 $\pm$ 0.04 | 22.51 $\pm$ 2.08  | 0.1 $\pm$ 0.01  | 1.93 $\pm$ 0.36 | 0.06 $\pm$ 0.01 | 0.51 $\pm$ 0.07 | 0.2 $\pm$ 0.03  | 0.29 $\pm$ 0.04 | 0.22 $\pm$ 0.04 | 1.61 $\pm$ 0.18 | 0.11 $\pm$ 0.01     | 0.03 $\pm$ 0.01 |
|                            | W4                    | 0.27 $\pm$ 0.02 | 0.24 $\pm$ 0.05 | 0.4 $\pm$ 0.04  | 0.17 $\pm$ 0.02 | 28.39 $\pm$ 5.26  | 0.11 $\pm$ 0.03 | 2.31 $\pm$ 0.35 | 0.06 $\pm$ 0    | 0.21 $\pm$ 0.05 | 0.07 $\pm$ 0.02 | 0.42 $\pm$ 0.1  | 0.3 $\pm$ 0.07  | 1.81 $\pm$ 0.23 | 0.15 $\pm$ 0.02     | 0.03 $\pm$ 0.01 |
| Regent                     | W1                    | 0.17 $\pm$ 0.02 | 0.33 $\pm$ 0.07 | 0.45 $\pm$ 0.11 | 0.52 $\pm$ 0.08 | 51.42 $\pm$ 9.02  | 0.14 $\pm$ 0.02 | 0.76 $\pm$ 0.11 | 0.05 $\pm$ 0.01 | 0.31 $\pm$ 0    | 0.09 $\pm$ 0.01 | 0.24 $\pm$ 0    | 0.27 $\pm$ 0.04 | 1.07 $\pm$ 0.14 | 0.12 $\pm$ 0.03     | 0.04 $\pm$ 0.01 |
|                            | W2                    | 0.19 $\pm$ 0.04 | 0.32 $\pm$ 0.04 | 0.57 $\pm$ 0.01 | 0.66 $\pm$ 0.18 | 43.21 $\pm$ 3.63  | 0.09 $\pm$ 0    | 1.79 $\pm$ 0.28 | 0.04 $\pm$ 0.01 | 0.1 $\pm$ 0.02  | 0.04 $\pm$ 0    | 0.19 $\pm$ 0.02 | 0.26 $\pm$ 0.02 | 1.1 $\pm$ 0.05  | 0.1 $\pm$ 0.01      | 0.03 $\pm$ 0    |
|                            | W3                    | 0.16 $\pm$ 0    | 0.26 $\pm$ 0.01 | 0.92 $\pm$ 0.04 | 0.27 $\pm$ 0.07 | 31.02 $\pm$ 0.19  | 0.23 $\pm$ 0.02 | 1.6 $\pm$ 0.35  | 0.06 $\pm$ 0.01 | 0.49 $\pm$ 0.13 | 0.13 $\pm$ 0.04 | 0.66 $\pm$ 0.2  | 0.36 $\pm$ 0    | 2.33 $\pm$ 0.28 | 0.21 $\pm$ 0.01     | 0.05 $\pm$ 0    |
|                            | W4                    | 0.22 $\pm$ 0.01 | 0.32 $\pm$ 0.03 | 0.81 $\pm$ 0.02 | 0.42 $\pm$ 0.05 | 37.88 $\pm$ 3.26  | 0.16 $\pm$ 0.02 | 1.73 $\pm$ 0.33 | 0.03 $\pm$ 0    | 0.13 $\pm$ 0.03 | 0.04 $\pm$ 0.01 | 0.37 $\pm$ 0.05 | 0.39 $\pm$ 0.04 | 2.19 $\pm$ 0.17 | 0.18 $\pm$ 0.05     | 0.06 $\pm$ 0.01 |
| Solaris                    | W1                    | 0.63 $\pm$ 0.07 | 0.27 $\pm$ 0.02 | 0.54 $\pm$ 0.09 | 0.47 $\pm$ 0.03 | 45.3 $\pm$ 8.76   | 0.11 $\pm$ 0.02 | 1.03 $\pm$ 0.19 | 0.05 $\pm$ 0.01 | 0.06 $\pm$ 0.01 | 0.01 $\pm$ 0    | 0.15 $\pm$ 0.02 | 0.13 $\pm$ 0.01 | 0.75 $\pm$ 0.06 | 0.07 $\pm$ 0.01     | 0.09 $\pm$ 0.01 |
|                            | W2                    | 0.52 $\pm$ 0.1  | 0.41 $\pm$ 0.07 | 1.05 $\pm$ 0.23 | 0.62 $\pm$ 0.06 | 80.98 $\pm$ 8.42  | 0.23 $\pm$ 0.03 | 1.41 $\pm$ 0.33 | 0.09 $\pm$ 0    | 0.23 $\pm$ 0.04 | 0.04 $\pm$ 0.01 | 0.19 $\pm$ 0.04 | 0.24 $\pm$ 0.03 | 0.87 $\pm$ 0.18 | 0.07 $\pm$ 0.02     | 0.18 $\pm$ 0.01 |
|                            | W3                    | 1.36 $\pm$ 0.11 | 0.22 $\pm$ 0.01 | 0.41 $\pm$ 0.07 | 0.11 $\pm$ 0.02 | 22.82 $\pm$ 0.29  | 0.03 $\pm$ 0    | 1.89 $\pm$ 0.3  | 0.04 $\pm$ 0    | 0.06 $\pm$ 0.01 | 0.02 $\pm$ 0    | 0.22 $\pm$ 0.03 | 0.21 $\pm$ 0.05 | 1.02 $\pm$ 0.09 | 0.08 $\pm$ 0        | 0.13 $\pm$ 0.03 |
|                            | W4                    | 0.25 $\pm$ 0.04 | 0.11 $\pm$ 0.01 | 0.51 $\pm$ 0.09 | 0.27 $\pm$ 0.03 | 28.04 $\pm$ 5.15  | 0.07 $\pm$ 0.01 | 3.02 $\pm$ 0.43 | 0.06 $\pm$ 0.01 | 0.1 $\pm$ 0.02  | 0.01 $\pm$ 0    | 0.16 $\pm$ 0.02 | 0.18 $\pm$ 0.01 | 1.08 $\pm$ 0.12 | 0.11 $\pm$ 0.01     | 0.03 $\pm$ 0.01 |

Table S1 continued

| <i>V. vinifera</i><br>cv. | Mediu<br>m<br>variant | m16                | m17             | m19                | m20                          | m21                     | m22                        | m25                 | m29                          | m18                         | m26                          | m27                                   | m24             | m32                      | m35                    | m23              |
|---------------------------|-----------------------|--------------------|-----------------|--------------------|------------------------------|-------------------------|----------------------------|---------------------|------------------------------|-----------------------------|------------------------------|---------------------------------------|-----------------|--------------------------|------------------------|------------------|
|                           |                       | Flavan-3-ols       |                 |                    |                              |                         |                            |                     |                              | Flavonols                   |                              |                                       | Stilbenoids DP1 |                          |                        | DP2              |
|                           |                       | procyanid<br>in B2 | epicatechi<br>n | procyanid<br>in C1 | procyanid<br>in gallate<br>1 | procyanidi<br>n gallate | procyani<br>din<br>dimer 5 | catechin<br>gallate | procyanid<br>in gallate<br>3 | quercetin<br>e<br>glucoside | quercetin<br>glucuroni<br>de | quercetin-<br>3-O-<br>galactosid<br>e | piceid          | trans<br>resveratro<br>l | cis<br>resveratro<br>l | restrytisol<br>1 |
| Johanniter                | W1                    | 0.14±0.04          | 1.25±0.21       | 0.14±0.04          | 0.09±0.01                    | 0.97±0.08               | 0.11±0.02                  | 1.55±0.26           | 0.04±0.01                    | 0.03±0                      | 0.23±0.04                    | 0.05±0.01                             | 1.96±0.36       | 0.16±0.04                | 0.05±0                 | 0.02±0           |
|                           | W2                    | 0.24±0.02          | 1±0.14          | 0.2±0.02           | 0.1±0.02                     | 1.44±0.36               | 0.19±0.05                  | 2.62±0.13           | 0.06±0.01                    | 0.03±0                      | 0.25±0.03                    | 0.07±0.01                             | 2.47±0.27       | 0.05±0.01                | 0.02±0.01              | 0.04±0.01        |
|                           | W3                    | 0.18±0.02          | 1.13±0.08       | 0.16±0.03          | 0.08±0.01                    | 0.76±0.13               | 0.17±0.03                  | 1.08±0.08           | 0.04±0                       | 0.05±0.01                   | 0.18±0.01                    | 0.04±0.01                             | 1.38±0.2        | 0.02±0                   | 0.01±0.01              | 0.03±0           |
|                           | W4                    | 0.15±0.02          | 1.11±0.11       | 0.18±0.04          | 0.08±0.01                    | 0.66±0.04               | 0.14±0.02                  | 1.21±0.12           | 0.04±0                       | 0.06±0.01                   | 0.11±0.01                    | 0.06±0.01                             | 2.39±0.36       | 0.03±0                   | 0±0.01                 | 0.05±0           |
| Chardonnay                | W1                    | 0.14±0.02          | 0.73±0.13       | 0.21±0.03          | 0.09±0.02                    | 0.69±0.08               | 0.08±0.01                  | 1.16±0.18           | 0.04±0                       | 0.02±0                      | 0.08±0                       | 0.05±0.01                             | 1.4±0.32        | 0.14±0.03                | 0.02±0.03              | 0.05±0.01        |
|                           | W2                    | 0.11±0.03          | 0.81±0.16       | 0.1±0.01           | 0.04±0.01                    | 0.4±0.09                | 0.05±0.01                  | 0.74±0.17           | 0.03±0                       | 0.01±0                      | 0.1±0.02                     | 0.05±0.01                             | 1.2±0.22        | 0.14±0.02                | 0.01±0                 | 0.03±0           |
|                           | W3                    | 0.09±0.01          | 0.57±0.06       | 0.07±0.01          | 0.04±0.01                    | 0.3±0.05                | 0.07±0.01                  | 0.54±0.1            | 0.02±0                       | 0.02±0                      | 0.06±0.01                    | 0.04±0.01                             | 0.84±0.1        | 0.02±0                   | 0.01±0.01              | 0.03±0.01        |
|                           | W4                    | 0.06±0.01          | 0.35±0.05       | 0.05±0.01          | 0.05±0                       | 0.29±0.08               | 0.09±0.01                  | 0.55±0.07           | 0.02±0.01                    | 0.02±0                      | 0.1±0.01                     | 0.05±0.01                             | 0.58±0.08       | 0.02±0                   | 0±0.01                 | 0.04±0.01        |
| Riesling                  | W1                    | 0.05±0.01          | 0.49±0.07       | 0.03±0.01          | 0.04±0.01                    | 0.25±0.04               | 0.02±0                     | 0.58±0.04           | 0.01±0                       | 0.13±0.01                   | 0.04±0.01                    | 0.02±0                                | 0.96±0.14       | 0.24±0.03                | 0.02±0                 | 0.07±0.01        |
|                           | W2                    | 0.1±0.03           | 0.8±0.1         | 0.13±0.02          | 0.1±0.01                     | 0.65±0.07               | 0.06±0                     | 1.5±0.18            | 0.04±0.01                    | 0.04±0                      | 0.1±0.02                     | 0.04±0.01                             | 3.04±0.27       | 0.09±0.01                | 0.01±0                 | 0.05±0.01        |
|                           | W3                    | 0.07±0.01          | 0.31±0.01       | 0.07±0.01          | 0.04±0                       | 0.28±0.01               | 0.07±0.01                  | 0.58±0.06           | 0.01±0                       | 0.1±0.02                    | 0.14±0.02                    | 0.04±0.01                             | 1.17±0.11       | 0.03±0                   | 0±0.01                 | 0.02±0           |
|                           | W4                    | 0.02±0             | 0.07±0.01       | 0.03±0             | 0.02±0                       | 0.11±0.03               | 0.01±0                     | 0.16±0.03           | 0.01±0                       | 0.04±0.01                   | 0.12±0.02                    | 0.03±0.01                             | 0.45±0.02       | 0.06±0.01                | 0.01±0                 | 0.05±0.01        |
| Cabernet<br>cortis        | W1                    | 0.06±0.01          | 0.44±0.09       | 0.1±0.02           | 0.1±0.01                     | 0.44±0.05               | 0.06±0.02                  | 1.51±0.17           | 0.03±0.01                    | 0.02±0                      | 0.02±0                       | 0.05±0.01                             | 0.66±0.1        | 0.02±0                   | 0.01±0                 | 0.02±0           |
|                           | W2                    | 0.05±0.01          | 0.32±0.09       | 0.04±0.01          | 0.07±0.01                    | 0.49±0.01               | 0.03±0.01                  | 1.43±0.17           | 0.03±0.01                    | 0.01±0                      | 0.02±0                       | 0.03±0.01                             | 0.78±0.22       | 0.01±0                   | 0.01±0                 | 0.02±0           |
|                           | W3                    | 0.08±0.02          | 0.97±0.13       | 0.07±0.01          | 0.11±0.01                    | 0.78±0.08               | 0.08±0.01                  | 1.91±0.08           | 0.03±0                       | 0.02±0                      | 0.05±0                       | 0.03±0.01                             | 0.34±0.05       | 0.01±0                   | 0±0.01                 | 0.03±0           |
|                           | W4                    | 0.12±0.02          | 1.92±0.14       | 0.12±0.02          | 0.16±0.04                    | 0.97±0.17               | 0.14±0.02                  | 2.59±0.46           | 0.05±0.01                    | 0.03±0                      | 0.04±0.01                    | 0.05±0.01                             | 0.89±0.13       | 0.03±0.01                | 0±0                    | 0.07±0.01        |
| Hibernal                  | W1                    | 0.14±0.02          | 0.87±0.09       | 0.1±0.02           | 0.17±0.03                    | 1.14±0.14               | 0.05±0.01                  | 2.75±0.14           | 0.07±0.01                    | 0.03±0.01                   | 0.06±0.01                    | 0.09±0.02                             | 1.04±0.12       | 0.08±0.01                | 0.01±0.01              | 0.03±0           |
|                           | W2                    | 0.13±0.01          | 1.1±0.19        | 0.17±0             | 0.21±0.04                    | 1.22±0.15               | 0.09±0.01                  | 3.09±0.39           | 0.07±0.01                    | 0.02±0                      | 0.07±0.01                    | 0.09±0                                | 2.59±0.47       | 0.04±0.01                | 0±0.01                 | 0.03±0           |
|                           | W3                    | 0.06±0.02          | 0.45±0.08       | 0.05±0.01          | 0.06±0.01                    | 0.55±0.08               | 0.07±0.01                  | 1.9±0.14            | 0.04±0                       | 0.05±0                      | 0.08±0.01                    | 0.03±0.01                             | 1.13±0.22       | 0.04±0.01                | 0.02±0.01              | 0.05±0.01        |
|                           | W4                    | 0.07±0.01          | 0.59±0.08       | 0.1±0.03           | 0.07±0.01                    | 0.54±0.18               | 0.11±0.01                  | 1.71±0.33           | 0.03±0.01                    | 0.05±0.01                   | 0.06±0.01                    | 0.05±0.01                             | 2.63±0.69       | 0.03±0.01                | 0.01±0.01              | 0.06±0           |
| Regent                    | W1                    | 0.05±0.01          | 0.73±0.13       | 0.06±0.01          | 0.11±0.01                    | 0.75±0.22               | 0.08±0.02                  | 1.78±0.09           | 0.03±0                       | 0.07±0.01                   | 0.05±0.01                    | 0.02±0                                | 1.48±0.31       | 0.07±0.01                | 0.01±0.01              | 0.04±0.01        |
|                           | W2                    | 0.03±0             | 0.31±0.06       | 0.03±0             | 0.06±0.01                    | 0.35±0.04               | 0.06±0.01                  | 0.99±0.04           | 0.01±0                       | 0.04±0.01                   | 0.02±0                       | 0.01±0                                | 1.39±0.15       | 0.1±0.01                 | 0.05±0.04              | 0.11±0.01        |
|                           | W3                    | 0.05±0.02          | 0.78±0.13       | 0.05±0.01          | 0.1±0                        | 0.6±0.03                | 0.13±0.02                  | 1.8±0.48            | 0.05±0.01                    | 0.07±0.02                   | 0.12±0                       | 0.04±0                                | 1.14±0.31       | 0.05±0.01                | 0.01±0                 | 0.08±0.02        |
|                           | W4                    | 0.09±0.02          | 0.64±0.09       | 0.12±0.02          | 0.11±0.02                    | 0.95±0.25               | 0.12±0                     | 2.2±0.19            | 0.04±0                       | 0.02±0                      | 0.05±0                       | 0.04±0                                | 1.78±0.36       | 0.04±0.01                | 0.01±0                 | 0.09±0.01        |
| Solaris                   | W1                    | 0.07±0.01          | 0.49±0.08       | 0.08±0.01          | 0.17±0.02                    | 0.81±0.05               | 0.04±0.01                  | 2.11±0.34           | 0.05±0                       | 0.01±0                      | 0.03±0                       | 0.06±0.01                             | 1.39±0.17       | 0.03±0                   | 0.01±0                 | 0.02±0           |
|                           | W2                    | 0.19±0.02          | 1.18±0.08       | 0.23±0.06          | 0.26±0.05                    | 1.16±0.1                | 0.05±0                     | 2.6±0.33            | 0.09±0                       | 0.02±0                      | 0.13±0.01                    | 0.1±0.02                              | 2.38±0.47       | 0.04±0                   | 0.01±0                 | 0.02±0           |
|                           | W3                    | 0.14±0.03          | 0.97±0.08       | 0.1±0.01           | 0.21±0                       | 1.13±0.16               | 0.1±0.02                   | 1.91±0.38           | 0.04±0                       | 0.01±0                      | 0.04±0.01                    | 0.12±0                                | 1.46±0.25       | 0.01±0                   | 0.01±0.01              | 0.04±0.01        |
|                           | W4                    | 0.04±0             | 0.4±0.11        | 0.03±0             | 0.08±0.02                    | 0.31±0.02               | 0.07±0.01                  | 1.61±0.25           | 0.03±0.01                    | 0.01±0                      | 0.09±0.01                    | 0.04±0                                | 0.62±0.12       | 0.02±0                   | 0.01±0.01              | 0.04±0           |

Table S1 continued

| V. vinifera cvs. | Medium variant | m28            | m31                         | m37                      | m38                      | m41                 | m42                 | m45                 | m36                  | m43                  | m33            | m34            | m39                    | m40                    | m44       | m46                    |
|------------------|----------------|----------------|-----------------------------|--------------------------|--------------------------|---------------------|---------------------|---------------------|----------------------|----------------------|----------------|----------------|------------------------|------------------------|-----------|------------------------|
|                  |                | Stilbenoid DP2 |                             |                          |                          |                     |                     |                     | Stilbenoid DP3       |                      | Stilbenoid DP4 |                |                        |                        |           |                        |
|                  |                | ampelopsin A   | resveratrol dimer glycosylé | Z- $\epsilon$ -viniferin | E- $\epsilon$ -viniferin | $\alpha$ -viniferin | $\omega$ -viniferin | $\delta$ -viniferin | resveratrol trimer 1 | resveratrol trimer 4 | hopeaphenol    | isohopeaphenol | resveratrol tetramer 3 | resveratrol tetramer 4 | vitisin B | resveratrol tetramer 6 |
| Johanniter       | W1             | 0.08±0.01      | 1.59±0.13                   | 0.08±0.02                | 0.24±0.05                | 0.02±0              | 1.51±0.22           | 0.02±0.01           | 0.41±0.01            | 0.08±0.02            | 0.1±0          | 0.16±0.01      | 0.01±0                 | 0.05±0.01              | 0.05±0    | 0.01±0                 |
|                  | W2             | 0.05±0.01      | 3.79±0.12                   | 0.05±0.01                | 0.17±0.04                | 0.01±0              | 1.7±0.1             | 0.02±0.01           | 0.47±0.11            | 0.07±0.01            | 0.13±0.01      | 0.11±0.01      | 0.01±0                 | 0.09±0.01              | 0.03±0    | 0±0                    |
|                  | W3             | 0.33±0.05      | 2.1±0.04                    | 0.08±0.01                | 0.56±0.06                | 0.06±0              | 1.37±0.15           | 0.01±0              | 0.52±0.07            | 0.11±0.01            | 0.49±0.06      | 0.2±0.04       | 0.01±0.01              | 0.05±0                 | 0.6±0     | 0.03±0                 |
|                  | W4             | 0.11±0.02      | 2.39±0.36                   | 0.06±0.01                | 0.33±0.06                | 0.04±0              | 3.08±0.24           | 0.04±0.02           | 0.63±0.08            | 0.13±0.01            | 0.18±0.02      | 0.18±0.01      | 0.01±0                 | 0.07±0                 | 0.22±0.06 | 0.02±0                 |
| Chardonnay       | W1             | 0.06±0.01      | 1.66±0.23                   | 0.1±0.02                 | 1.26±0.04                | 0.08±0              | 3.06±0.05           | 0.08±0.01           | 0.26±0.04            | 0.36±0.01            | 0.07±0.01      | 0.35±0.01      | 0.03±0.01              | 0.02±0                 | 0.03±0    | 0.02±0                 |
|                  | W2             | 0.03±0.01      | 0.97±0.09                   | 0.02±0.02                | 0.08±0.01                | 0.01±0              | 0.99±0.22           | 0.01±0.01           | 0.21±0.04            | 0.11±0.02            | 0.01±0.01      | 0.04±0         | 0±0                    | 0.02±0                 | 0.01±0    | 0±0                    |
|                  | W3             | 0.09±0.01      | 1.57±0.09                   | 0.13±0.04                | 0.35±0.05                | 0.04±0.01           | 2.82±0.15           | 0.04±0.02           | 0.32±0.04            | 0.38±0.03            | 0.06±0.01      | 0.28±0.03      | 0.02±0                 | 0.02±0                 | 0.1±0.02  | 0.02±0                 |
|                  | W4             | 0.14±0         | 1.39±0.22                   | 0.11±0.02                | 0.27±0.03                | 0.03±0              | 1.52±0.07           | 0.03±0.03           | 0.25±0.03            | 0.25±0.01            | 0.1±0.01       | 0.17±0.02      | 0.02±0                 | 0.01±0                 | 0.17±0.01 | 0.02±0                 |
| Riesling         | W1             | 0.15±0.02      | 2.29±0.19                   | 0.3±0.01                 | 1.64±0.15                | 0.13±0.02           | 10.45±0.27          | 0.03±0              | 0.36±0.05            | 0.7±0.1              | 0.65±0.08      | 0.64±0.08      | 0.07±0.01              | 0.03±0                 | 0.24±0.04 | 0.05±0                 |
|                  | W2             | 0.03±0.01      | 1.54±0.14                   | 0.05±0.01                | 0.26±0.05                | 0.05±0              | 2.01±0.39           | 0.01±0.01           | 0.43±0.06            | 0.13±0.01            | 0.08±0.01      | 0.14±0.03      | 0.01±0                 | 0.06±0.01              | 0.02±0    | 0.01±0                 |
|                  | W3             | 0.18±0.02      | 1.17±0.1                    | 0.08±0                   | 0.39±0.08                | 0.03±0              | 1.14±0.19           | 0.01±0              | 0.15±0.02            | 0.17±0.05            | 0.5±0.07       | 0.14±0.02      | 0.01±0                 | 0.01±0                 | 0.29±0.02 | 0.01±0                 |
|                  | W4             | 0.08±0         | 0.67±0.12                   | 0.08±0.02                | 0.19±0.02                | 0.01±0              | 1.59±0.12           | 0.01±0              | 0.32±0.05            | 0.13±0.02            | 0.26±0.06      | 0.09±0.01      | 0.01±0                 | 0.02±0                 | 0.17±0.02 | 0.01±0                 |
| Cabernet cortis  | W1             | 0.01±0         | 1.86±0.22                   | 0.04±0                   | 0.18±0.01                | 0.01±0              | 3.44±0.04           | 0.03±0.01           | 0.43±0.03            | 0.19±0.04            | 0.03±0.01      | 0.07±0.02      | 0.01±0                 | 0.06±0.01              | 0.06±0.01 | 0.01±0                 |
|                  | W2             | 0±0            | 0.95±0.17                   | 0.02±0.02                | 0.05±0.02                | 0.01±0              | 3.27±0              | 0.01±0              | 0.33±0.04            | 0.13±0.07            | 0.01±0         | 0.05±0.02      | 0±0                    | 0.08±0.01              | 0.01±0    | 0±0                    |
|                  | W3             | 0.03±0         | 1.76±0.3                    | 0.06±0.01                | 0.45±0.05                | 0.04±0.01           | 2.19±0.24           | 0.02±0              | 0.29±0.03            | 0.17±0.01            | 0.04±0         | 0.08±0.02      | 0.02±0                 | 0.04±0                 | 0.48±0.06 | 0.02±0                 |
|                  | W4             | 0.01±0         | 3.27±0.68                   | 0.08±0                   | 0.41±0.09                | 0.08±0.02           | 3.17±0.06           | 0.02±0              | 0.68±0.13            | 0.41±0.1             | 0.04±0         | 0.29±0.09      | 0.03±0                 | 0.06±0.01              | 0.22±0    | 0.02±0                 |
| Hibernal         | W1             | 0.01±0         | 1.44±0.3                    | 0.03±0                   | 0.3±0.03                 | 0.02±0.01           | 4.61±0.25           | 0.03±0.01           | 0.54±0.06            | 0.25±0.02            | 0.02±0         | 0.09±0.01      | 0.01±0                 | 0.09±0.02              | 0.02±0    | 0.01±0                 |
|                  | W2             | 0±0            | 1.81±0.04                   | 0.08±0.01                | 0.15±0.02                | 0.02±0              | 3.32±0.24           | 0.01±0              | 0.48±0.08            | 0.14±0.01            | 0.01±0         | 0.14±0.03      | 0.01±0                 | 0.08±0.01              | 0.01±0    | 0.01±0                 |
|                  | W3             | 0.03±0         | 2.62±0.15                   | 0.11±0                   | 0.59±0.15                | 0.09±0.01           | 5.69±0.14           | 0.02±0              | 0.77±0.12            | 0.67±0.04            | 0.1±0.01       | 0.45±0.05      | 0.03±0                 | 0.07±0.01              | 0.09±0.01 | 0.03±0                 |
|                  | W4             | 0.02±0         | 2.26±0.38                   | 0.09±0.02                | 0.23±0.03                | 0.02±0              | 3.82±0.6            | 0.03±0              | 0.69±0.14            | 0.38±0.08            | 0.08±0.02      | 0.19±0.03      | 0.02±0                 | 0.05±0                 | 0.07±0.01 | 0.02±0                 |
| Regent           | W1             | 0.04±0         | 2.38±0.17                   | 0.28±0.01                | 0.39±0.03                | 0.05±0              | 3.2±0.21            | 0.07±0.03           | 0.44±0.08            | 0.39±0.04            | 0.14±0.03      | 0.72±0.06      | 0.05±0                 | 0.04±0.01              | 0.05±0.01 | 0.03±0                 |
|                  | W2             | 0.03±0.01      | 3.51±0.14                   | 0.29±0.04                | 0.47±0.08                | 0.06±0              | 11.28±0.36          | 0.05±0.01           | 0.74±0.15            | 0.99±0.14            | 0.12±0.01      | 0.83±0.07      | 0.05±0                 | 0.09±0.02              | 0.08±0.01 | 0.03±0                 |
|                  | W3             | 0.21±0.05      | 1.63±0.15                   | 0.27±0.05                | 0.56±0.07                | 0.06±0.01           | 2.89±0.59           | 0.03±0              | 0.75±0.09            | 0.13±0.03            | 0.42±0         | 0.57±0.01      | 0.05±0.01              | 0.04±0.01              | 0.34±0.06 | 0.04±0                 |
|                  | W4             | 0.12±0.02      | 2.36±0.3                    | 0.26±0.02                | 0.44±0.09                | 0.05±0              | 6.63±0.31           | 0.02±0              | 1.09±0.06            | 0.39±0.03            | 0.22±0.01      | 0.47±0.02      | 0.05±0                 | 0.08±0                 | 0.28±0.01 | 0.03±0                 |
| Solaris          | W1             | 0.01±0         | 2.28±0.29                   | 0.03±0                   | 0.11±0.01                | 0.01±0              | 1.06±0.15           | 0.02±0.02           | 0.21±0.03            | 0.24±0.02            | 0.03±0         | 0.15±0.01      | 0.01±0                 | 0.04±0                 | 0.01±0    | 0.01±0                 |
|                  | W2             | 0±0            | 1.76±0.24                   | 0±0                      | 0.05±0                   | 0±0                 | 1.9±0.43            | 0.02±0.02           | 0.21±0.06            | 0.13±0.02            | 0.01±0         | 0.05±0.01      | 0±0                    | 0.04±0                 | 0.01±0    | 0±0                    |
|                  | W3             | 0.01±0         | 1.38±0.07                   | 0.09±0                   | 0.12±0.01                | 0.01±0              | 1.64±0.13           | 0.01±0              | 0.29±0.01            | 0.26±0.03            | 0.03±0.01      | 0.23±0.04      | 0.02±0                 | 0.09±0.02              | 0.01±0    | 0.01±0                 |
|                  | W4             | 0.01±0         | 0.78±0.05                   | 0.11±0.02                | 0.27±0.06                | 0.02±0              | 2.87±0.13           | 0.02±0              | 0.36±0.11            | 0.23±0.02            | 0.07±0.02      | 0.29±0.05      | 0.04±0                 | 0.08±0.01              | 0.06±0.01 | 0.01±0                 |
